# Supplementary material
Source: MDPI journal article supplement (https://www.mdpi.com/2304-6740/4/3/27)

# checkCIF/PLATON report

Structure factors have been supplied for datablock(s) xln23

THIS REPORT IS FOR GUIDANCE ONLY. IF USED AS PART OF A REVIEW PROCEDURE FOR PUBLICATION, IT SHOULD NOT REPLACE THE EXPERTISE OF AN EXPERIENCED CRYSTALLOGRAPHIC REFEREE.

No syntax errors found.      CIF dictionary      Interpreting this report

## Datablock: xln23

---

|                 |                                                  |                            |
|-----------------|--------------------------------------------------|----------------------------|
| Bond precision: | C-C = 0.0094 Å                                   | Wavelength=1.54178         |
| Cell:           | a=19.4879(3)      b=14.7720(2)      c=21.4793(3) |                            |
|                 | alpha=90      beta=90.3530(14)      gamma=90     |                            |
| Temperature:    | 100 K                                            |                            |
|                 | Calculated                                       | Reported                   |
| Volume          | 6183.24(15)                                      | 6183.22(16)                |
| Space group     | C c                                              | C 1 c 1                    |
| Hall group      | C -2yc                                           | C -2yc                     |
| Moiety formula  | C51 Er F51 O8 P2, C H2 Cl2                       | C51 Er F51 O8 P2, C H2 Cl2 |
| Sum formula     | C52 H2 Cl2 Er F51 O8 P2                          | C52 H2 Cl2 Er F51 O8 P2    |
| Mr              | 2023.64                                          | 2023.64                    |
| Dx,g cm-3       | 2.174                                            | 2.174                      |
| Z               | 4                                                | 4                          |
| Mu (mm-1)       | 5.786                                            | 5.786                      |
| F000            | 3876.0                                           | 3876.0                     |
| F000'           | 3863.42                                          |                            |
| h,k,lmax        | 23,17,25                                         | 23,17,25                   |
| Nref            | 11316[ 5662]                                     | 9617                       |
| Tmin,Tmax       | 0.118,0.099                                      | 0.423,1.000                |
| Tmin'           | 0.005                                            |                            |

Correction method= # Reported T Limits: Tmin=0.423 Tmax=1.000  
AbsCorr = MULTI-SCAN

Data completeness= 1.70/0.85      Theta(max)= 68.230

R(reflections)= 0.0323( 9617)      wR2(reflections)= 0.0832( 9617)

S = 1.053      Npar= 1073

---

The following ALERTS were generated. Each ALERT has the format

**test-name\_ALERT\_alert-type\_alert-level.**

Click on the hyperlinks for more details of the test.

---

### 🟡 Alert level B

|                   |                                                 |      |              |
|-------------------|-------------------------------------------------|------|--------------|
| PLAT090_ALERT_3_B | Poor Data / Parameter Ratio (Zmax > 18) .....   | 5.24 | Note         |
| PLAT213_ALERT_2_B | Atom F45B has ADP max/min Ratio .....           | 5.0  | prolat       |
| PLAT213_ALERT_2_B | Atom F48 has ADP max/min Ratio .....            | 4.1  | prolat       |
| PLAT213_ALERT_2_B | Atom F50 has ADP max/min Ratio .....            | 4.5  | prolat       |
| PLAT213_ALERT_2_B | Atom C18 has ADP max/min Ratio .....            | 4.6  | prolat       |
| PLAT434_ALERT_2_B | Short Inter HL..HL Contact F12 .. F46A ..       | 2.38 | Ang.         |
| PLAT987_ALERT_1_B | The Flack x is >> 0 - Do a BASF/TWIN Refinement |      | Please Check |

---

### 🟡 Alert level C

|                   |                                                                  |        |        |
|-------------------|------------------------------------------------------------------|--------|--------|
| PLAT213_ALERT_2_C | Atom F8 has ADP max/min Ratio .....                              | 3.7    | oblate |
| PLAT213_ALERT_2_C | Atom F18 has ADP max/min Ratio .....                             | 3.1    | oblate |
| PLAT213_ALERT_2_C | Atom F22 has ADP max/min Ratio .....                             | 3.3    | prolat |
| PLAT213_ALERT_2_C | Atom F23 has ADP max/min Ratio .....                             | 3.1    | prolat |
| PLAT213_ALERT_2_C | Atom F28 has ADP max/min Ratio .....                             | 3.3    | oblate |
| PLAT213_ALERT_2_C | Atom F34 has ADP max/min Ratio .....                             | 3.4    | prolat |
| PLAT213_ALERT_2_C | Atom F37 has ADP max/min Ratio .....                             | 3.5    | prolat |
| PLAT213_ALERT_2_C | Atom F38 has ADP max/min Ratio .....                             | 3.2    | prolat |
| PLAT213_ALERT_2_C | Atom F46B has ADP max/min Ratio .....                            | 3.3    | prolat |
| PLAT213_ALERT_2_C | Atom F51 has ADP max/min Ratio .....                             | 3.8    | prolat |
| PLAT213_ALERT_2_C | Atom F45A has ADP max/min Ratio .....                            | 3.2    | prolat |
| PLAT213_ALERT_2_C | Atom F47A has ADP max/min Ratio .....                            | 3.6    | prolat |
| PLAT213_ALERT_2_C | Atom C10 has ADP max/min Ratio .....                             | 3.3    | prolat |
| PLAT213_ALERT_2_C | Atom C21 has ADP max/min Ratio .....                             | 3.5    | oblate |
| PLAT213_ALERT_2_C | Atom C40 has ADP max/min Ratio .....                             | 3.3    | oblate |
| PLAT213_ALERT_2_C | Atom C43 has ADP max/min Ratio .....                             | 3.8    | prolat |
| PLAT220_ALERT_2_C | Large Non-Solvent C Ueq(max)/Ueq(min) Range                      | 4.9    | Ratio  |
| PLAT220_ALERT_2_C | Large Non-Solvent F Ueq(max)/Ueq(min) Range                      | 5.7    | Ratio  |
| PLAT242_ALERT_2_C | Low Ueq as Compared to Neighbors for .....                       | C47    | Check  |
| PLAT342_ALERT_3_C | Low Bond Precision on C-C Bonds .....                            | 0.0094 | Ang.   |
| PLAT790_ALERT_4_C | Centre of Gravity not Within Unit Cell: Resd. # C51 Er F51 O8 P2 | 1      | Note   |
| PLAT911_ALERT_3_C | Missing # FCF Refl Between THmin & STh/L= 0.600                  | 43     | Report |
| PLAT918_ALERT_3_C | Reflection(s) with I(obs) much smaller I(calc) .                 | 4      | Check  |

---

### 🟡 Alert level G

|                   |                                                  |                |        |
|-------------------|--------------------------------------------------|----------------|--------|
| PLAT002_ALERT_2_G | Number of Distance or Angle Restraints on AtSite | 7              | Note   |
| PLAT003_ALERT_2_G | Number of Uiso or Uij Restrained non-H Atoms ... | 22             | Report |
| PLAT063_ALERT_4_G | Crystal Size Likely too Large for Beam Size .... | 0.80           | mm     |
| PLAT083_ALERT_2_G | SHELXL Second Parameter in WGHT Unusually Large. | 28.98          | Why ?  |
| PLAT176_ALERT_4_G | The CIF-Embedded .res File Contains SADI Records | 3              | Report |
| PLAT177_ALERT_4_G | The CIF-Embedded .res File Contains DELU Records | 1              | Report |
| PLAT178_ALERT_4_G | The CIF-Embedded .res File Contains SIMU Records | 1              | Report |
| PLAT242_ALERT_2_G | Low Ueq as Compared to Neighbors for .....       | C46            | Check  |
| PLAT242_ALERT_2_G | Low Ueq as Compared to Neighbors for .....       | C51            | Check  |
| PLAT301_ALERT_3_G | Main Residue Disorder .....                      | Percentage = 3 | Note   |
| PLAT432_ALERT_2_G | Short Inter X...Y Contact F18 .. C17 ..          | 2.90           | Ang.   |
| PLAT432_ALERT_2_G | Short Inter X...Y Contact F33 .. C27 ..          | 2.93           | Ang.   |
| PLAT432_ALERT_2_G | Short Inter X...Y Contact F34 .. C36 ..          | 2.94           | Ang.   |
| PLAT432_ALERT_2_G | Short Inter X...Y Contact F44 .. C3 ..           | 2.93           | Ang.   |
| PLAT432_ALERT_2_G | Short Inter X...Y Contact F44 .. C2 ..           | 2.93           | Ang.   |
| PLAT434_ALERT_2_G | Short Inter HL..HL Contact C12 .. F46B ..        | 3.11           | Ang.   |
| PLAT434_ALERT_2_G | Short Inter HL..HL Contact F4 .. F22 ..          | 2.77           | Ang.   |
| PLAT434_ALERT_2_G | Short Inter HL..HL Contact F7 .. F19 ..          | 2.83           | Ang.   |
| PLAT434_ALERT_2_G | Short Inter HL..HL Contact F12 .. F42 ..         | 2.78           | Ang.   |
| PLAT434_ALERT_2_G | Short Inter HL..HL Contact F13 .. F23 ..         | 2.73           | Ang.   |
| PLAT434_ALERT_2_G | Short Inter HL..HL Contact F13 .. F39 ..         | 2.82           | Ang.   |
| PLAT434_ALERT_2_G | Short Inter HL..HL Contact F17 .. F47A ..        | 2.73           | Ang.   |
| PLAT434_ALERT_2_G | Short Inter HL..HL Contact F22 .. F33 ..         | 2.83           | Ang.   |

|                   |                                                  |         |    |              |
|-------------------|--------------------------------------------------|---------|----|--------------|
| PLAT434_ALERT_2_G | Short Inter HL..HL Contact F24                   | .. F37  | .. | 2.77 Ang.    |
| PLAT434_ALERT_2_G | Short Inter HL..HL Contact F29                   | .. F46A | .. | 2.81 Ang.    |
| PLAT434_ALERT_2_G | Short Inter HL..HL Contact F29                   | .. F32  | .. | 2.82 Ang.    |
| PLAT434_ALERT_2_G | Short Inter HL..HL Contact F29                   | .. F47B | .. | 2.83 Ang.    |
| PLAT434_ALERT_2_G | Short Inter HL..HL Contact F30                   | .. F34  | .. | 2.78 Ang.    |
| PLAT434_ALERT_2_G | Short Inter HL..HL Contact F32                   | .. F47A | .. | 2.72 Ang.    |
| PLAT434_ALERT_2_G | Short Inter HL..HL Contact F38                   | .. F47B | .. | 2.66 Ang.    |
| PLAT790_ALERT_4_G | Centre of Gravity not Within Unit Cell: Resd.    | #       |    | 2 Note       |
|                   | C H2 Cl2                                         |         |    |              |
| PLAT860_ALERT_3_G | Number of Least-Squares Restraints .....         |         |    | 149 Note     |
| PLAT870_ALERT_4_G | ALERTS Related to Twinning Effects Suppressed .. |         |    | ! Info       |
| PLAT961_ALERT_5_G | Dataset Contains no Negative Intensities .....   |         |    | Please Check |

---

0 **ALERT level A** = Most likely a serious problem - resolve or explain  
7 **ALERT level B** = A potentially serious problem, consider carefully  
23 **ALERT level C** = Check. Ensure it is not caused by an omission or oversight  
34 **ALERT level G** = General information/check it is not something unexpected

1 ALERT type 1 CIF construction/syntax error, inconsistent or missing data  
49 ALERT type 2 Indicator that the structure model may be wrong or deficient  
6 ALERT type 3 Indicator that the structure quality may be low  
7 ALERT type 4 Improvement, methodology, query or suggestion  
1 ALERT type 5 Informative message, check

---

It is advisable to attempt to resolve as many as possible of the alerts in all categories. Often the minor alerts point to easily fixed oversights, errors and omissions in your CIF or refinement strategy, so attention to these fine details can be worthwhile. In order to resolve some of the more serious problems it may be necessary to carry out additional measurements or structure refinements. However, the purpose of your study may justify the reported deviations and the more serious of these should normally be commented upon in the discussion or experimental section of a paper or in the "special\_details" fields of the CIF. checkCIF was carefully designed to identify outliers and unusual parameters, but every test has its limitations and alerts that are not important in a particular case may appear. Conversely, the absence of alerts does not guarantee there are no aspects of the results needing attention. It is up to the individual to critically assess their own results and, if necessary, seek expert advice.

### Publication of your CIF in IUCr journals

A basic structural check has been run on your CIF. These basic checks will be run on all CIFs submitted for publication in IUCr journals (*Acta Crystallographica*, *Journal of Applied Crystallography*, *Journal of Synchrotron Radiation*); however, if you intend to submit to *Acta Crystallographica Section C* or *E*, you should make sure that full publication checks are run on the final version of your CIF prior to submission.

### Publication of your CIF in other journals

Please refer to the *Notes for Authors* of the relevant journal for any special instructions relating to CIF submission.

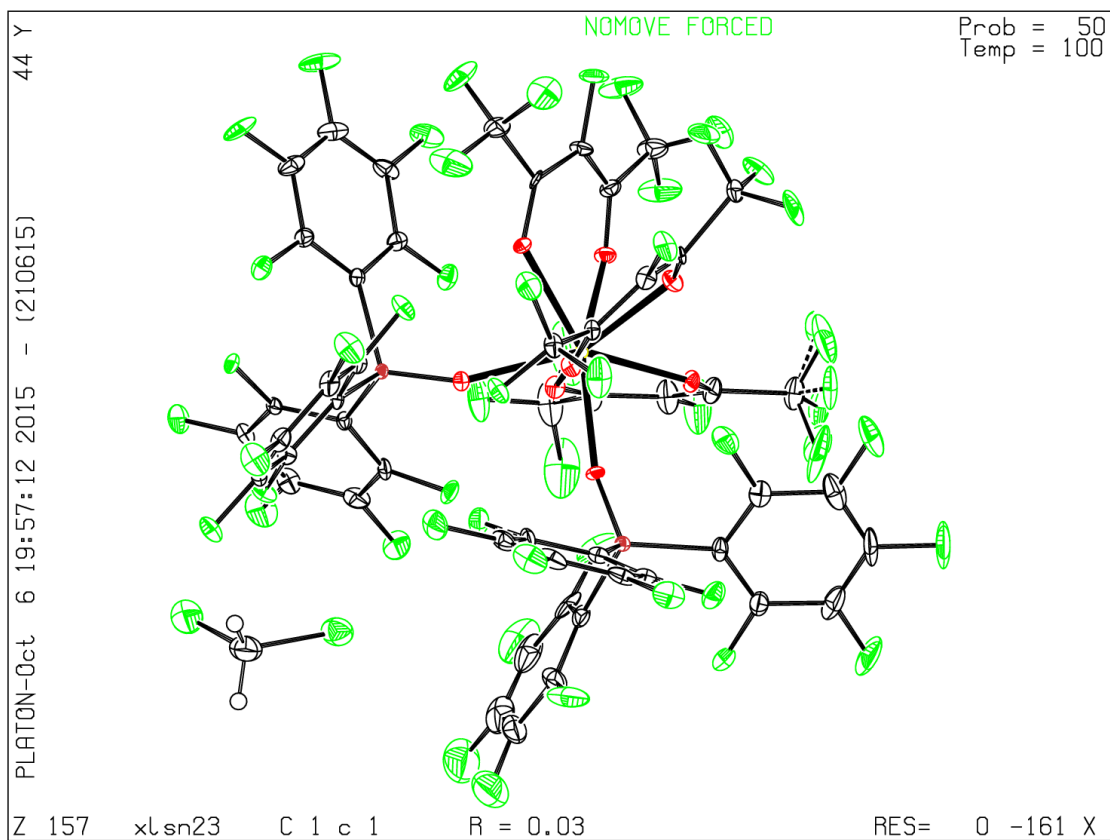

Supplement: s1 [file s1]
