# Supplementary material
Source: MDPI journal article supplement (https://www.mdpi.com/2304-6740/4/3/27)

# checkCIF/PLATON report

Structure factors have been supplied for datablock(s) olsn164

THIS REPORT IS FOR GUIDANCE ONLY. IF USED AS PART OF A REVIEW PROCEDURE FOR PUBLICATION, IT SHOULD NOT REPLACE THE EXPERTISE OF AN EXPERIENCED CRYSTALLOGRAPHIC REFEREE.

No syntax errors found.      CIF dictionary      Interpreting this report

## Datablock: olsn164

---

|                 |                                                  |                            |
|-----------------|--------------------------------------------------|----------------------------|
| Bond precision: | C-C = 0.0072 A                                   | Wavelength=0.71073         |
| Cell:           | a=19.5041(3)      b=14.7989(2)      c=21.4651(3) |                            |
|                 | alpha=90      beta=90.3628(12)      gamma=90     |                            |
| Temperature:    | 103 K                                            |                            |
|                 | Calculated                                       | Reported                   |
| Volume          | 6195.55(15)                                      | 6195.53(16)                |
| Space group     | C c                                              | C 1 c 1                    |
| Hall group      | C -2yc                                           | C -2yc                     |
| Moiety formula  | C51 F51 O8 P2 Tm, C H2 Cl2                       | C51 F51 O8 P2 Tm, C H2 Cl2 |
| Sum formula     | C52 H2 Cl2 F51 O8 P2 Tm                          | C52 H2 Cl2 F51 O8 P2 Tm    |
| Mr              | 2025.31                                          | 2025.31                    |
| Dx,g cm-3       | 2.171                                            | 2.171                      |
| Z               | 4                                                | 4                          |
| Mu (mm-1)       | 1.779                                            | 1.779                      |
| F000            | 3880.0                                           | 3880.0                     |
| F000'           | 3884.88                                          |                            |
| h,k,lmax        | 27,20,29                                         | 27,20,29                   |
| Nref            | 17340[ 8675]                                     | 14562                      |
| Tmin,Tmax       | 0.233,0.411                                      | 0.682,1.000                |
| Tmin'           | 0.162                                            |                            |

Correction method= # Reported T Limits: Tmin=0.682 Tmax=1.000  
AbsCorr = MULTI-SCAN

Data completeness= 1.68/0.84      Theta(max)= 29.574

R(reflections)= 0.0285( 14207)      wR2(reflections)= 0.0754( 14562)

S = 1.045      Npar= 1073

---

The following ALERTS were generated. Each ALERT has the format

**test-name\_ALERT\_alert-type\_alert-level.**

Click on the hyperlinks for more details of the test.

---

### Alert level B

|                   |                                              |                             |      |        |
|-------------------|----------------------------------------------|-----------------------------|------|--------|
| PLAT213_ALERT_2_B | Atom F8                                      | has ADP max/min Ratio ..... | 4.4  | prolat |
| PLAT434_ALERT_2_B | Short Inter HL..HL Contact F7                | .. F51B ..                  | 2.44 | Ang.   |
| PLAT910_ALERT_3_B | Missing # of FCF Reflection(s) Below Th(Min) | ...                         | 11   | Report |
| PLAT934_ALERT_3_B | Number of (Iobs-Icalc)/SigmaW > 10 Outliers  | ....                        | 6    | Check  |

---

### Alert level C

|                   |                                                |                             |       |        |
|-------------------|------------------------------------------------|-----------------------------|-------|--------|
| PLAT090_ALERT_3_C | Poor Data / Parameter Ratio (Zmax > 18)        | .....                       | 8.07  | Note   |
| PLAT213_ALERT_2_C | Atom F7                                        | has ADP max/min Ratio ..... | 3.7   | prolat |
| PLAT213_ALERT_2_C | Atom F9                                        | has ADP max/min Ratio ..... | 3.8   | prolat |
| PLAT213_ALERT_2_C | Atom F46                                       | has ADP max/min Ratio ..... | 3.5   | prolat |
| PLAT213_ALERT_2_C | Atom F47                                       | has ADP max/min Ratio ..... | 3.6   | prolat |
| PLAT213_ALERT_2_C | Atom F48                                       | has ADP max/min Ratio ..... | 3.5   | prolat |
| PLAT213_ALERT_2_C | Atom F50B                                      | has ADP max/min Ratio ..... | 3.5   | prolat |
| PLAT213_ALERT_2_C | Atom F51A                                      | has ADP max/min Ratio ..... | 3.4   | prolat |
| PLAT213_ALERT_2_C | Atom C10                                       | has ADP max/min Ratio ..... | 3.4   | prolat |
| PLAT213_ALERT_2_C | Atom C11                                       | has ADP max/min Ratio ..... | 3.1   | prolat |
| PLAT220_ALERT_2_C | Large Non-Solvent C                            | Ueq(max)/Ueq(min) Range     | 4.0   | Ratio  |
| PLAT220_ALERT_2_C | Large Non-Solvent F                            | Ueq(max)/Ueq(min) Range     | 5.4   | Ratio  |
| PLAT915_ALERT_3_C | Low Friedel Pair Coverage                      | .....                       | 68    | %      |
| PLAT918_ALERT_3_C | Reflection(s) with I(obs) much smaller I(calc) | .                           | 1     | Check  |
| PLAT971_ALERT_2_C | Check Calcd Residual Density                   | 0.88A From Tml              | 1.54  | eA-3   |
| PLAT976_ALERT_2_C | Check Calcd Residual Density                   | 0.97A From O2               | -0.47 | eA-3   |

---

### Alert level G

|                   |                                                  |                                        |      |        |
|-------------------|--------------------------------------------------|----------------------------------------|------|--------|
| PLAT003_ALERT_2_G | Number of Uiso or Uij Restrained non-H Atoms     | ...                                    | 7    | Report |
| PLAT063_ALERT_4_G | Crystal Size Likely too Large for Beam Size      | ....                                   | 1.00 | mm     |
| PLAT177_ALERT_4_G | The CIF-Embedded .res File Contains DELU Records |                                        | 1    | Report |
| PLAT178_ALERT_4_G | The CIF-Embedded .res File Contains SIMU Records |                                        | 1    | Report |
| PLAT242_ALERT_2_G | Low                                              | Ueq as Compared to Neighbors for ..... | C41  | Check  |
| PLAT242_ALERT_2_G | Low                                              | Ueq as Compared to Neighbors for ..... | C42  | Check  |
| PLAT242_ALERT_2_G | Low                                              | Ueq as Compared to Neighbors for ..... | C46  | Check  |
| PLAT242_ALERT_2_G | Low                                              | Ueq as Compared to Neighbors for ..... | C47  | Check  |
| PLAT242_ALERT_2_G | Low                                              | Ueq as Compared to Neighbors for ..... | C51  | Check  |
| PLAT301_ALERT_3_G | Main Residue Disorder                            | ..... Percentage =                     | 3    | Note   |
| PLAT432_ALERT_2_G | Short Inter X...Y Contact                        | F18 .. C11 ..                          | 2.90 | Ang.   |
| PLAT432_ALERT_2_G | Short Inter X...Y Contact                        | F33 .. C27 ..                          | 2.93 | Ang.   |
| PLAT432_ALERT_2_G | Short Inter X...Y Contact                        | F34 .. C36 ..                          | 2.93 | Ang.   |
| PLAT432_ALERT_2_G | Short Inter X...Y Contact                        | F44 .. C3 ..                           | 2.93 | Ang.   |
| PLAT432_ALERT_2_G | Short Inter X...Y Contact                        | F44 .. C2 ..                           | 2.94 | Ang.   |
| PLAT434_ALERT_2_G | Short Inter HL..HL Contact                       | F4 .. F22 ..                           | 2.78 | Ang.   |
| PLAT434_ALERT_2_G | Short Inter HL..HL Contact                       | F7 .. F42 ..                           | 2.79 | Ang.   |
| PLAT434_ALERT_2_G | Short Inter HL..HL Contact                       | F8 .. F23 ..                           | 2.69 | Ang.   |
| PLAT434_ALERT_2_G | Short Inter HL..HL Contact                       | F8 .. F39 ..                           | 2.83 | Ang.   |
| PLAT434_ALERT_2_G | Short Inter HL..HL Contact                       | F17 .. F50B ..                         | 2.77 | Ang.   |
| PLAT434_ALERT_2_G | Short Inter HL..HL Contact                       | F22 .. F33 ..                          | 2.81 | Ang.   |
| PLAT434_ALERT_2_G | Short Inter HL..HL Contact                       | F24 .. F37 ..                          | 2.76 | Ang.   |
| PLAT434_ALERT_2_G | Short Inter HL..HL Contact                       | F29 .. F50A ..                         | 2.81 | Ang.   |
| PLAT434_ALERT_2_G | Short Inter HL..HL Contact                       | F29 .. F51B ..                         | 2.82 | Ang.   |
| PLAT434_ALERT_2_G | Short Inter HL..HL Contact                       | F29 .. F32 ..                          | 2.83 | Ang.   |
| PLAT434_ALERT_2_G | Short Inter HL..HL Contact                       | F30 .. F34 ..                          | 2.78 | Ang.   |
| PLAT434_ALERT_2_G | Short Inter HL..HL Contact                       | F32 .. F50B ..                         | 2.77 | Ang.   |
| PLAT434_ALERT_2_G | Short Inter HL..HL Contact                       | F38 .. F50A ..                         | 2.65 | Ang.   |
| PLAT860_ALERT_3_G | Number of Least-Squares Restraints               | .....                                  | 86   | Note   |

---

0 **ALERT level A** = Most likely a serious problem - resolve or explain

4 **ALERT level B** = A potentially serious problem, consider carefully

16 **ALERT level C** = Check. Ensure it is not caused by an omission or oversight

29 **ALERT level G** = General information/check it is not something unexpected

0 ALERT type 1 CIF construction/syntax error, inconsistent or missing data  
39 ALERT type 2 Indicator that the structure model may be wrong or deficient  
7 ALERT type 3 Indicator that the structure quality may be low  
3 ALERT type 4 Improvement, methodology, query or suggestion  
0 ALERT type 5 Informative message, check

---

It is advisable to attempt to resolve as many as possible of the alerts in all categories. Often the minor alerts point to easily fixed oversights, errors and omissions in your CIF or refinement strategy, so attention to these fine details can be worthwhile. In order to resolve some of the more serious problems it may be necessary to carry out additional measurements or structure refinements. However, the purpose of your study may justify the reported deviations and the more serious of these should normally be commented upon in the discussion or experimental section of a paper or in the "special\_details" fields of the CIF. checkCIF was carefully designed to identify outliers and unusual parameters, but every test has its limitations and alerts that are not important in a particular case may appear. Conversely, the absence of alerts does not guarantee there are no aspects of the results needing attention. It is up to the individual to critically assess their own results and, if necessary, seek expert advice.

### **Publication of your CIF in IUCr journals**

A basic structural check has been run on your CIF. These basic checks will be run on all CIFs submitted for publication in IUCr journals (*Acta Crystallographica*, *Journal of Applied Crystallography*, *Journal of Synchrotron Radiation*); however, if you intend to submit to *Acta Crystallographica Section C* or *E*, you should make sure that full publication checks are run on the final version of your CIF prior to submission.

### **Publication of your CIF in other journals**

Please refer to the *Notes for Authors* of the relevant journal for any special instructions relating to CIF submission.

---

**PLATON version of 21/06/2015; check.def file version of 21/06/2015**

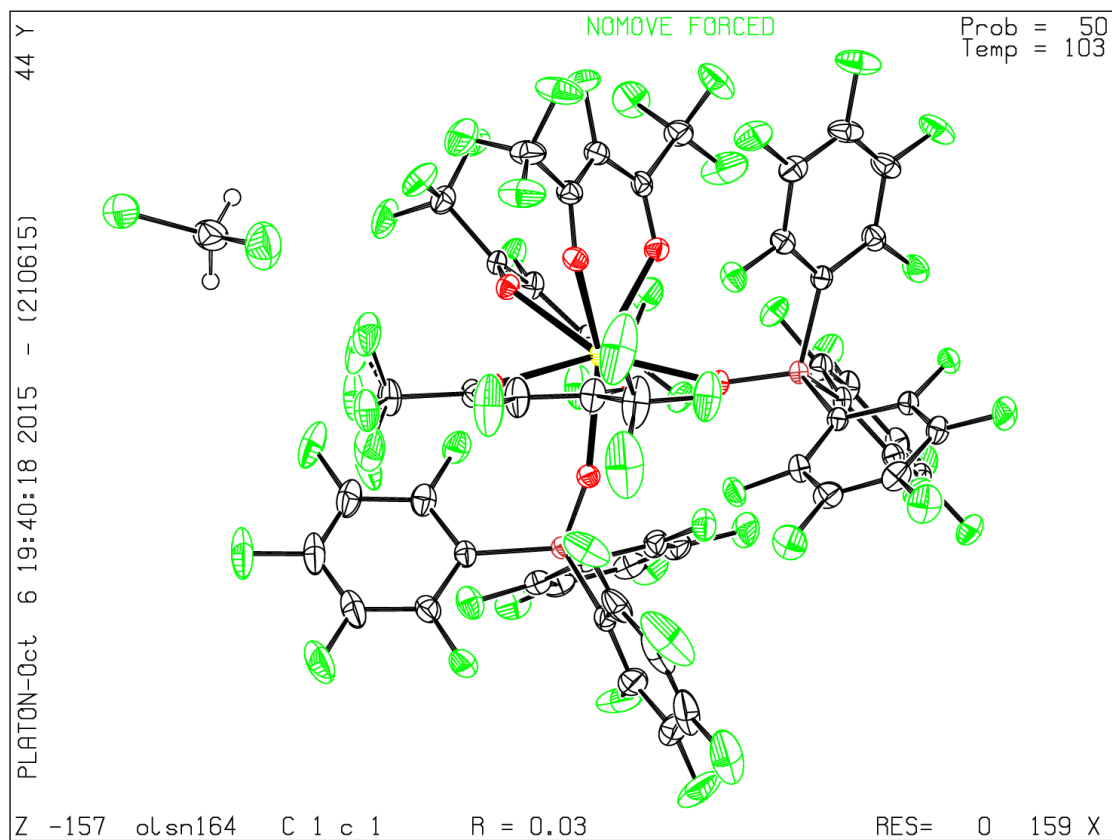

Supplement: s1 [file s1]
