# Supplementary material
Source: MDPI journal article supplement (https://www.mdpi.com/2304-6740/4/3/27)

# checkCIF/PLATON report

Structure factors have been supplied for datablock(s) olsn165

THIS REPORT IS FOR GUIDANCE ONLY. IF USED AS PART OF A REVIEW PROCEDURE FOR PUBLICATION, IT SHOULD NOT REPLACE THE EXPERTISE OF AN EXPERIENCED CRYSTALLOGRAPHIC REFEREE.

No syntax errors found.      CIF dictionary      Interpreting this report

## Datablock: olsn165

---

|                 |                            |                                |
|-----------------|----------------------------|--------------------------------|
| Bond precision: | C-C = 0.0115 A             | Wavelength=0.71073             |
| Cell:           | a=19.5641(4)               | b=14.7311(4)      c=21.5669(6) |
|                 | alpha=90                   | beta=90.046(2)      gamma=90   |
| Temperature:    | 184 K                      |                                |
|                 | Calculated                 | Reported                       |
| Volume          | 6215.6(3)                  | 6215.6(3)                      |
| Space group     | C c                        | C 1 c 1                        |
| Hall group      | C -2yc                     | C -2yc                         |
| Moiety formula  | C51 F51 O8 P2 Sm, C H2 Cl2 | C51 F51 O8 P2 Sm, C H2 Cl2     |
| Sum formula     | C52 H2 Cl2 F51 O8 P2 Sm    | C52 H2 Cl2 F51 O8 P2 Sm        |
| Mr              | 2006.74                    | 2006.73                        |
| Dx,g cm-3       | 2.145                      | 2.144                          |
| Z               | 4                          | 4                              |
| Mu (mm-1)       | 1.291                      | 1.291                          |
| F000            | 3852.0                     | 3852.0                         |
| F000'           | 3857.48                    |                                |
| h,k,lmax        | 24,18,26                   | 24,18,26                       |
| Nref            | 12713[ 6361]               | 8632                           |
| Tmin,Tmax       | 0.465,0.597                | 0.385,1.000                    |
| Tmin'           | 0.352                      |                                |

Correction method= # Reported T Limits: Tmin=0.385 Tmax=1.000  
AbsCorr = MULTI-SCAN

Data completeness= 1.36/0.68      Theta(max)= 26.367

R(reflections)= 0.0356( 8380)      wR2(reflections)= 0.1059( 8632)

S = 1.035      Npar= 1045

---

The following ALERTS were generated. Each ALERT has the format

**test-name\_ALERT\_alert-type\_alert-level.**

Click on the hyperlinks for more details of the test.

---

### Alert level B

|                   |                                                  |      |       |
|-------------------|--------------------------------------------------|------|-------|
| PLAT090_ALERT_3_B | Poor Data / Parameter Ratio (Zmax > 18) .....    | 5.98 | Note  |
| PLAT915_ALERT_3_B | Low Friedel Pair Coverage .....                  | 38   | %     |
| PLAT919_ALERT_3_B | Reflection # Likely Affected by the Beamstop ... | 1    | Check |
| PLAT934_ALERT_3_B | Number of (Iobs-Icalc)/SigmaW > 10 Outliers .... | 2    | Check |

---

### Alert level C

|                   |                                                  |                                        |        |        |
|-------------------|--------------------------------------------------|----------------------------------------|--------|--------|
| PLAT213_ALERT_2_C | Atom F47                                         | has ADP max/min Ratio .....            | 3.7    | prolat |
| PLAT220_ALERT_2_C | Large Non-Solvent F                              | Ueq(max)/Ueq(min) Range                | 4.3    | Ratio  |
| PLAT242_ALERT_2_C | Low                                              | Ueq as Compared to Neighbors for ..... | C47    | Check  |
| PLAT244_ALERT_4_C | Low 'Solvent' Ueq as Compared to Neighbors of    |                                        | C52    | Check  |
| PLAT342_ALERT_3_C | Low Bond Precision on C-C Bonds .....            | 0.0115                                 | Ang.   |        |
| PLAT910_ALERT_3_C | Missing # of FCF Reflection(s) Below Th(Min) ... | 10                                     | Report |        |
| PLAT911_ALERT_3_C | Missing # FCF Refl Between THmin & STh/L= 0.600  | 77                                     | Report |        |
| PLAT918_ALERT_3_C | Reflection(s) with I(obs) much smaller I(calc) . | 2                                      | Check  |        |
| PLAT972_ALERT_2_C | Check Calcd Residual Density 1.13A From Sml      | -1.77                                  | eA-3   |        |
| PLAT972_ALERT_2_C | Check Calcd Residual Density 0.94A From Sml      | -1.63                                  | eA-3   |        |

---

### Alert level G

|                   |                                                  |                                        |      |       |
|-------------------|--------------------------------------------------|----------------------------------------|------|-------|
| PLAT063_ALERT_4_G | Crystal Size Likely too Large for Beam Size .... | 0.80                                   | mm   |       |
| PLAT242_ALERT_2_G | Low                                              | Ueq as Compared to Neighbors for ..... | C41  | Check |
| PLAT242_ALERT_2_G | Low                                              | Ueq as Compared to Neighbors for ..... | C42  | Check |
| PLAT242_ALERT_2_G | Low                                              | Ueq as Compared to Neighbors for ..... | C46  | Check |
| PLAT242_ALERT_2_G | Low                                              | Ueq as Compared to Neighbors for ..... | C51  | Check |
| PLAT432_ALERT_2_G | Short Inter X...Y Contact F34 .. C18 ..          | 2.94                                   | Ang. |       |
| PLAT432_ALERT_2_G | Short Inter X...Y Contact F43 .. C20 ..          | 2.91                                   | Ang. |       |
| PLAT432_ALERT_2_G | Short Inter X...Y Contact F43 .. C21 ..          | 2.95                                   | Ang. |       |
| PLAT434_ALERT_2_G | Short Inter HL..HL Contact F7 .. F19 ..          | 2.76                                   | Ang. |       |
| PLAT434_ALERT_2_G | Short Inter HL..HL Contact F7 .. F51 ..          | 2.83                                   | Ang. |       |
| PLAT434_ALERT_2_G | Short Inter HL..HL Contact F7 .. F32 ..          | 2.84                                   | Ang. |       |
| PLAT434_ALERT_2_G | Short Inter HL..HL Contact F9 .. F36 ..          | 2.81                                   | Ang. |       |
| PLAT434_ALERT_2_G | Short Inter HL..HL Contact F13 .. F25 ..         | 2.78                                   | Ang. |       |
| PLAT434_ALERT_2_G | Short Inter HL..HL Contact F14 .. F33 ..         | 2.80                                   | Ang. |       |
| PLAT434_ALERT_2_G | Short Inter HL..HL Contact F15 .. F34 ..         | 2.78                                   | Ang. |       |
| PLAT434_ALERT_2_G | Short Inter HL..HL Contact F15 .. F33 ..         | 2.84                                   | Ang. |       |
| PLAT434_ALERT_2_G | Short Inter HL..HL Contact F17 .. F41 ..         | 2.83                                   | Ang. |       |
| PLAT434_ALERT_2_G | Short Inter HL..HL Contact F27 .. F42 ..         | 2.80                                   | Ang. |       |
| PLAT434_ALERT_2_G | Short Inter HL..HL Contact F28 .. F40 ..         | 2.82                                   | Ang. |       |
| PLAT434_ALERT_2_G | Short Inter HL..HL Contact F38 .. F45 ..         | 2.74                                   | Ang. |       |
| PLAT912_ALERT_4_G | Missing # of FCF Reflections Above STh/L= 0.600  | 24                                     | Note |       |

---

0 **ALERT level A** = Most likely a serious problem - resolve or explain  
4 **ALERT level B** = A potentially serious problem, consider carefully  
10 **ALERT level C** = Check. Ensure it is not caused by an omission or oversight  
21 **ALERT level G** = General information/check it is not something unexpected

0 ALERT type 1 CIF construction/syntax error, inconsistent or missing data  
24 ALERT type 2 Indicator that the structure model may be wrong or deficient  
8 ALERT type 3 Indicator that the structure quality may be low  
3 ALERT type 4 Improvement, methodology, query or suggestion  
0 ALERT type 5 Informative message, check

---

It is advisable to attempt to resolve as many as possible of the alerts in all categories. Often the minor alerts point to easily fixed oversights, errors and omissions in your CIF or refinement strategy, so attention to these fine details can be worthwhile. In order to resolve some of the more serious problems it may be necessary to carry out additional measurements or structure refinements. However, the purpose of your study may justify the reported deviations and the more serious of these should normally be commented upon in the discussion or experimental section of a paper or in the "special\_details" fields of the CIF. checkCIF was carefully designed to identify outliers and unusual parameters, but every test has its limitations and alerts that are not important in a particular case may appear. Conversely, the absence of alerts does not guarantee there are no aspects of the results needing attention. It is up to the individual to critically assess their own results and, if necessary, seek expert advice.

### **Publication of your CIF in IUCr journals**

A basic structural check has been run on your CIF. These basic checks will be run on all CIFs submitted for publication in IUCr journals (*Acta Crystallographica*, *Journal of Applied Crystallography*, *Journal of Synchrotron Radiation*); however, if you intend to submit to *Acta Crystallographica Section C* or *E*, you should make sure that full publication checks are run on the final version of your CIF prior to submission.

### **Publication of your CIF in other journals**

Please refer to the *Notes for Authors* of the relevant journal for any special instructions relating to CIF submission.

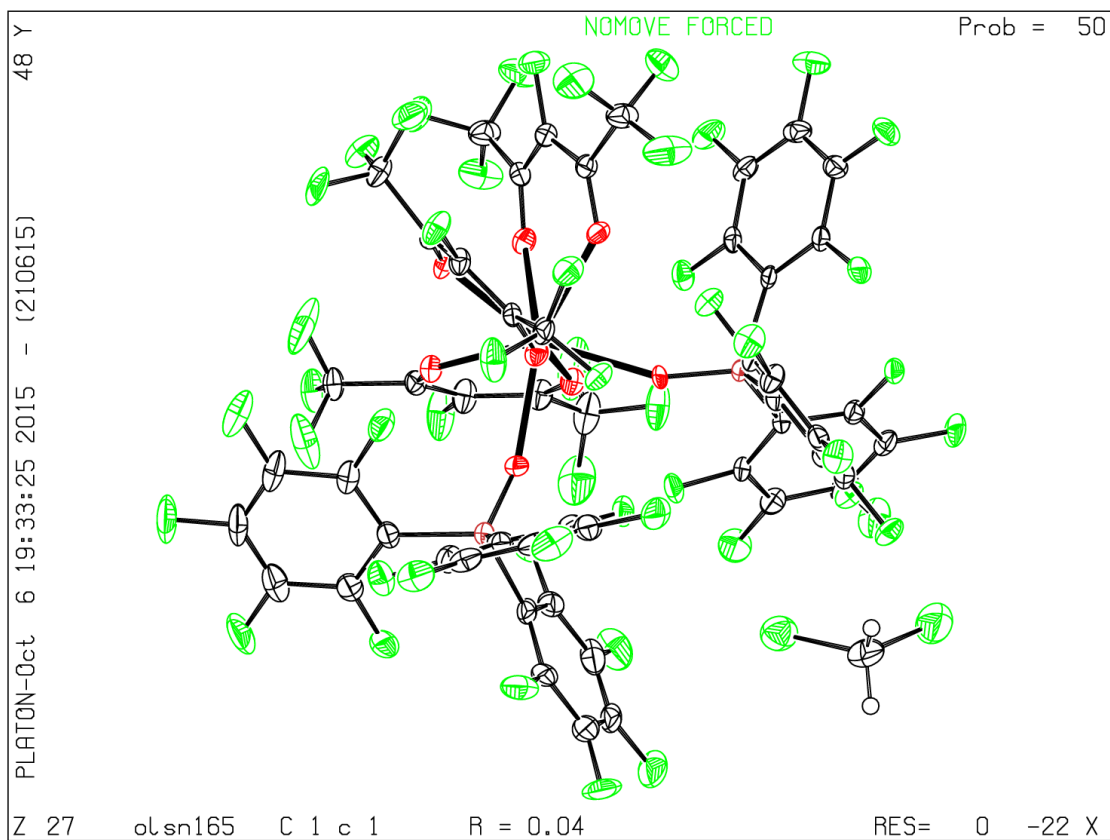

Supplement: s1 [file s1]
