# Supplementary material
Source: MDPI journal article supplement (https://www.mdpi.com/2304-6740/4/3/27)
Supplement: s1 [file s1]

# Supplementary Materials: Optical Properties of Heavily Fluorinated Lanthanide Tris $\beta$ -Diketonate Phosphine Oxide Adducts

Adam N. Swinburne, Madeleine H. Langford-Paden, Tsz Ling Chan, Simon Randall, Fabrizio Ortù, Alan M. Kenwright and Louise S. Natrajan

**Table S1.** Single crystal X-ray data collection and structural refinement for the complexes and unit cell parameters for 5.

| Parameter                                                                                            | 3 (CCDC 1472376)                                                  | 4 (CCDC 1472377)                                                  | 5                                                                 | 6 (CCDC 1472378)                                                                                | 7 (CCDC 1472379)                                                                                | 9 (CCDC 1472380)                                                                                | CCDC 1472382                                                                                    | 10 (CCDC 1472381)                                                                               |
|------------------------------------------------------------------------------------------------------|-------------------------------------------------------------------|-------------------------------------------------------------------|-------------------------------------------------------------------|-------------------------------------------------------------------------------------------------|-------------------------------------------------------------------------------------------------|-------------------------------------------------------------------------------------------------|-------------------------------------------------------------------------------------------------|-------------------------------------------------------------------------------------------------|
| Formula                                                                                              | C <sub>33</sub> H <sub>5</sub> F <sub>33</sub> O <sub>8</sub> PTb | C <sub>33</sub> H <sub>5</sub> F <sub>33</sub> O <sub>8</sub> PER | C <sub>33</sub> H <sub>5</sub> F <sub>33</sub> O <sub>8</sub> PYb | C <sub>52</sub> H <sub>2</sub> Cl <sub>2</sub> F <sub>51</sub> O <sub>8</sub> P <sub>2</sub> Sm | C <sub>52</sub> H <sub>2</sub> Cl <sub>2</sub> F <sub>51</sub> O <sub>8</sub> P <sub>2</sub> Eu | C <sub>52</sub> H <sub>2</sub> Cl <sub>2</sub> F <sub>51</sub> O <sub>8</sub> P <sub>2</sub> Er | C <sub>52</sub> H <sub>2</sub> Cl <sub>2</sub> F <sub>52</sub> O <sub>8</sub> P <sub>2</sub> Tm | C <sub>52</sub> H <sub>2</sub> Cl <sub>2</sub> F <sub>51</sub> O <sub>8</sub> P <sub>2</sub> Yb |
| Fw                                                                                                   | 1346.22                                                           | 1354.60                                                           | 1358.30                                                           | 2006.73                                                                                         | 2008.34                                                                                         | 2023.64                                                                                         | 2025.31                                                                                         | 2029.42                                                                                         |
| cryst size, mm                                                                                       | 0.21 × 0.45 × 0.73                                                | 0.05 × 0.10 × 0.30                                                | -                                                                 | 0.40 × 0.50 × 0.80                                                                              | 0.25 × 0.40 × 0.50                                                                              | 0.40 × 0.40 × 0.80                                                                              | 0.50 × 0.70 × 1.00                                                                              | 0.20 × 0.30 × 0.40                                                                              |
| crystal syst                                                                                         | triclinic                                                         | triclinic                                                         | triclinic                                                         | monoclinic                                                                                      | monoclinic                                                                                      | monoclinic                                                                                      | monoclinic                                                                                      | monoclinic                                                                                      |
| space group                                                                                          | <i>P</i> – 1                                                      | <i>P</i> – 1                                                      | <i>P</i> – 1                                                      | <i>Cc</i>                                                                                       | <i>P</i> 21                                                                                     | <i>Cc</i>                                                                                       | <i>Cc</i>                                                                                       | <i>Cc</i>                                                                                       |
| <i>a</i> , Å                                                                                         | 11.8690(4)                                                        | 11.8993(6)                                                        | 11.8505(16)                                                       | 19.5641(4)                                                                                      | 11.8578(2)                                                                                      | 19.4879(3)                                                                                      | 19.5041(3)                                                                                      | 19.4803(13)                                                                                     |
| <i>b</i> , Å                                                                                         | 13.0006(5)                                                        | 12.9623(6)                                                        | 12.9958(16)                                                       | 14.7311(4)                                                                                      | 22.9499(4)                                                                                      | 14.7720(2)                                                                                      | 14.7989(2)                                                                                      | 14.8269(10)                                                                                     |
| <i>c</i> , Å                                                                                         | 16.0853(5)                                                        | 16.1082(8)                                                        | 15.980(2)                                                         | 21.5669(6)                                                                                      | 11.9125(2)                                                                                      | 21.4793(3)                                                                                      | 21.4651(3)                                                                                      | 21.4352(15)                                                                                     |
| $\alpha$ , °                                                                                         | 110.653(3)                                                        | 110.744(5)                                                        | 110.828(12)°                                                      | 90                                                                                              | 90                                                                                              | 90                                                                                              | 90                                                                                              | 90                                                                                              |
| $\beta$ , °                                                                                          | 94.658(3)                                                         | 94.010(4)                                                         | 94.655(11)°                                                       | 90.046(3)                                                                                       | 104.640(2)                                                                                      | 90.3530(14)                                                                                     | 90.3628(12)                                                                                     | 90.484(2)                                                                                       |
| $\gamma$ , °                                                                                         | 114.343(4)                                                        | 114.162(5)                                                        | 115.026(13)°                                                      | 90                                                                                              | 90                                                                                              | 90                                                                                              | 90                                                                                              | 90                                                                                              |
| <i>V</i> , Å <sup>3</sup>                                                                            | 2039.92(16)                                                       | 2051.6(2)                                                         | 2004.8(6)                                                         | 6215.6(3)                                                                                       | 3136.56(10)                                                                                     | 6183.24(15)                                                                                     | 6195.55(15)                                                                                     | 6191.0(7)                                                                                       |
| <i>Z</i>                                                                                             | 2                                                                 | 2                                                                 | 2                                                                 | 4                                                                                               | 2                                                                                               | 4                                                                                               | 4                                                                                               | 4                                                                                               |
| $\rho_{\text{calcd}}$ , g·cm <sup>3</sup>                                                            | 2.192                                                             | 2.193                                                             | -                                                                 | 2.145                                                                                           | 2.126                                                                                           | 2.174                                                                                           | 2.171                                                                                           | 2.177                                                                                           |
| $\mu$ , mm <sup>−1</sup>                                                                             | 1.976                                                             | 2.286                                                             | -                                                                 | 1.291                                                                                           | 1.343                                                                                           | 5.786                                                                                           | 1.779                                                                                           | 6.057                                                                                           |
| <i>F</i> (000)                                                                                       | 1288                                                              | 1294                                                              | -                                                                 | 3852                                                                                            | 1928                                                                                            | 3876                                                                                            | 3880                                                                                            | 3884                                                                                            |
| No. of reflections (unique)                                                                          | 12681(7470)                                                       | 14628(7318)                                                       | -                                                                 | 14238(8632)                                                                                     | 11452(1045)                                                                                     | 67392(9617)                                                                                     | 28875(14561)                                                                                    | 28875(14561)                                                                                    |
| <i>S</i> <sup>a</sup>                                                                                | 1.03                                                              | 1.21                                                              | -                                                                 | 1.03                                                                                            | 1.11                                                                                            | 1.05                                                                                            | 1.04                                                                                            | 1.08                                                                                            |
| <i>R</i> 1( <i>wR</i> <sub>2</sub> ) ( <i>F</i> <sup>2</sup> > 2 $\sigma$ ( <i>F</i> <sup>2</sup> )) | 0.0396(0.0818)                                                    | 0.0593(0.1129)                                                    | -                                                                 | 0.0356(0.1059)                                                                                  | 0.0335(0.0838)                                                                                  | 0.0323(0.0832)                                                                                  | 0.0285(0.0743)                                                                                  | 0.0310(0.0829)                                                                                  |

|                                              |             |             |   |             |             |             |             |             |
|----------------------------------------------|-------------|-------------|---|-------------|-------------|-------------|-------------|-------------|
| Rint                                         | 0.044       | 0.046       | - | 0.036       | 0.036       | 0.032       | 0.027       | 0.045       |
| min., max.<br>diff map, e<br>Å <sup>-3</sup> | -0.79, 1.14 | -1.15, 1.52 | - | -1.45, 1.47 | -0.58, 1.12 | -1.41, 1.41 | -1.38, 1.49 | -1.29, 1.27 |

<sup>a</sup> Conventional  $R = \Sigma ||F_O| - |F_C|| / \Sigma |F_O|$ ;  $R_W = [\Sigma w(F_O^2 - F_C^2)^2 / \Sigma w(F_O^2)^2]^{1/2}$ ;  $S = [\Sigma w(F_O^2 - F_C^2)^2 / \text{No. data} - \text{No. params}]^{1/2}$  for all data.

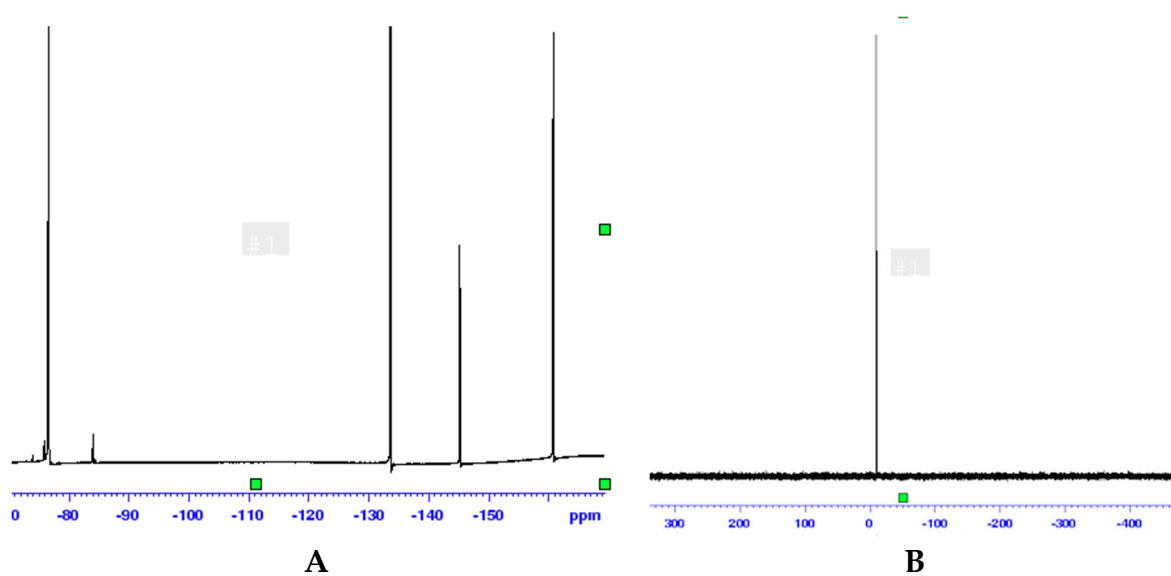

**Figure S1.**  $^{19}\text{F}$  (A) and  $^{31}\text{P}\{^1\text{H}\}$  (B) NMR spectra of  $[\text{Sm}(\text{hfac})_3\{(\text{Ar}^{\text{F}})_3\text{PO}\}(\text{H}_2\text{O})]$  (**1**) recorded in  $\text{CDCl}_3$  on a Bruker Avance 400 spectrometer at 295 K.

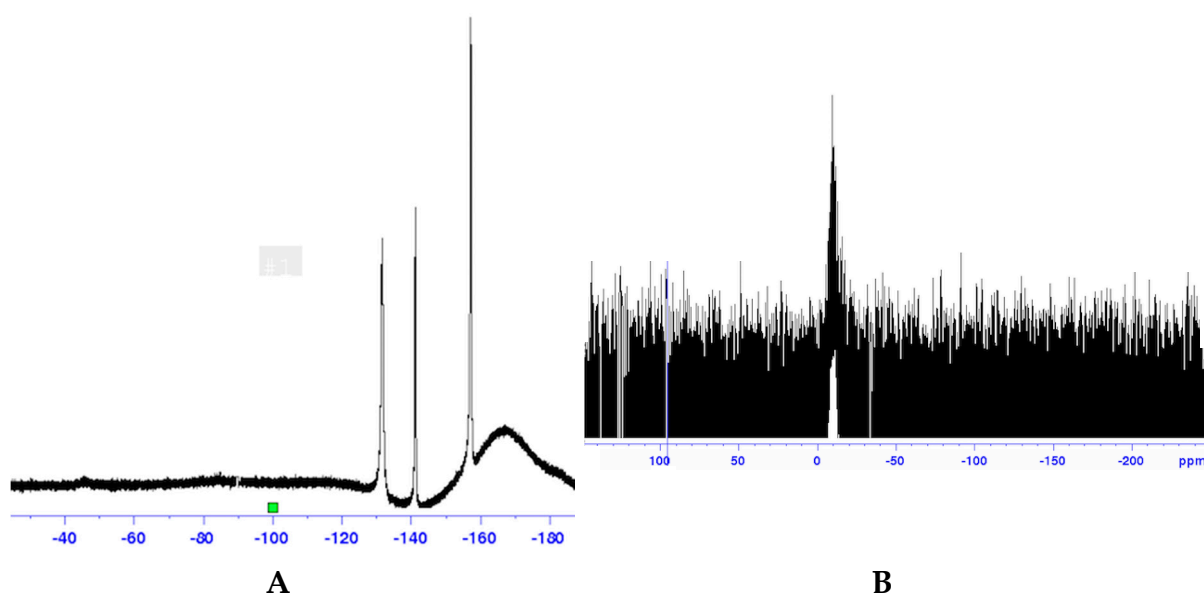

**Figure S2.**  $^{19}\text{F}$  (A) and  $^{31}\text{P}\{^1\text{H}\}$  (B) NMR spectra of  $[\text{Tb}(\text{hfac})_3\{(\text{Ar}^{\text{F}})_3\text{PO}\}(\text{H}_2\text{O})]$  (**3**) recorded in  $\text{CDCl}_3$  on a Bruker Avance 400 spectrometer at 295 K. Undulations in the baseline are due to the presence of Teflon<sup>TM</sup> that could not be satisfactorily corrected using baseline correction functions.

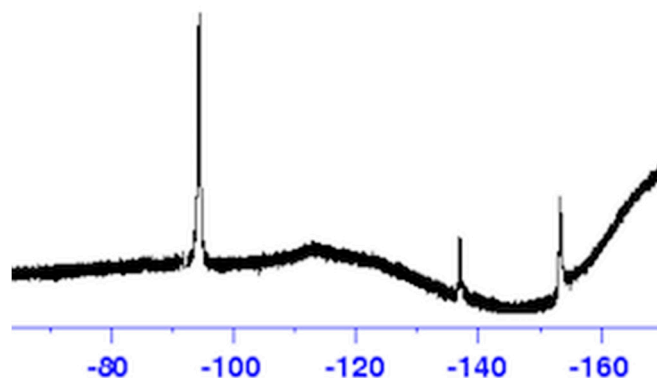

**Figure S3.**  $^{19}\text{F}$  NMR spectrum of  $[\text{Erhfac}]_3\{(\text{Ar}^{\text{F}})_3\text{PO}\}(\text{H}_2\text{O})$  (4) recorded in  $\text{CDCl}_3$  on a Bruker Avance 400 spectrometer at 295 K. The  $^{31}\text{P}\{^1\text{H}\}$  resonance of this compound was too broad to observe. Undulations in the baseline are due to the presence of Teflon<sup>TM</sup> that could not be satisfactorily corrected using baseline correction functions.

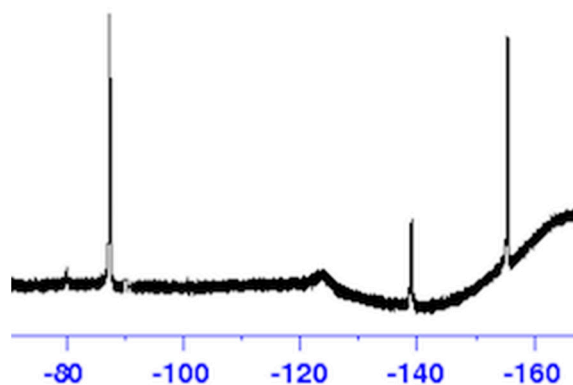

**Figure S4.**  $^{19}\text{F}$  NMR spectrum of  $[\text{Ybhfac}]_3\{(\text{Ar}^{\text{F}})_3\text{PO}\}(\text{H}_2\text{O})$  (5) recorded in  $\text{CDCl}_3$  on a Bruker Avance 400 spectrometer at 295 K. The  $^{31}\text{P}\{^1\text{H}\}$  resonance of this compound was too broad to observe.

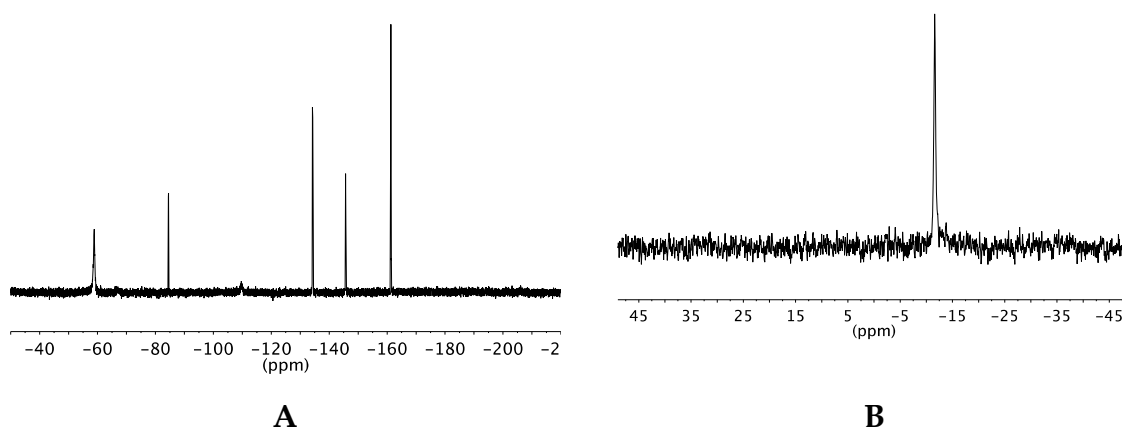

**Figure S5.**  $^{19}\text{F}$  (A) and  $^{31}\text{P}\{^1\text{H}\}$  (B) NMR spectra of  $[\text{Tb}(\text{F}_7\text{-acac})_3\{(\text{Ar}^{\text{F}})_3\text{PO}\}_2]$  (8) recorded in  $d_6$ -acetone on a Varian Mercury-200 spectrometer at 298 K.

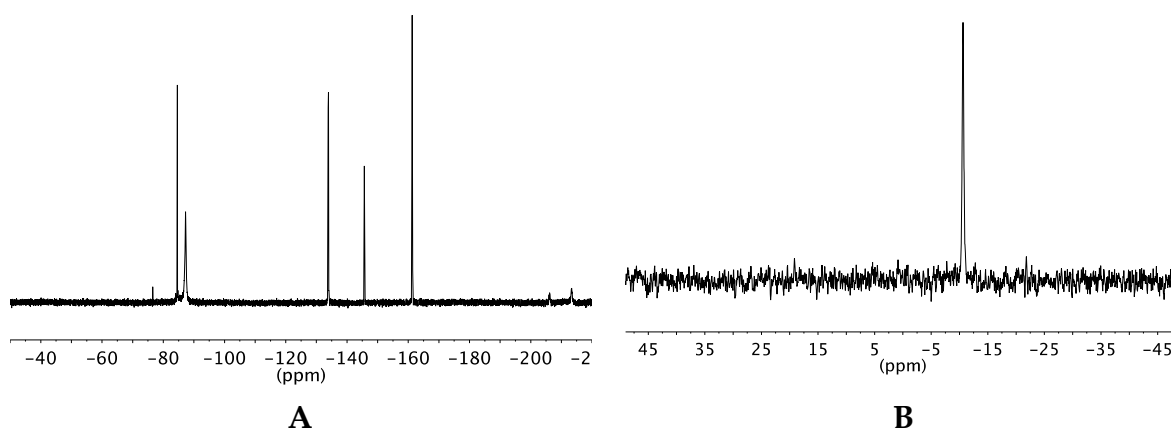

**Figure S6.**  $^{19}\text{F}$  (A) and  $^{31}\text{P}\{^1\text{H}\}$  (B) NMR spectra of  $[\text{Er}(\text{F}_7\text{-acac})_3\{(\text{Ar}^{\text{F}})_3\text{PO}\}_2]$  (**9**) recorded in  $d_6$ -acetone on a Varian Mercury-200 spectrometer at 298 K.

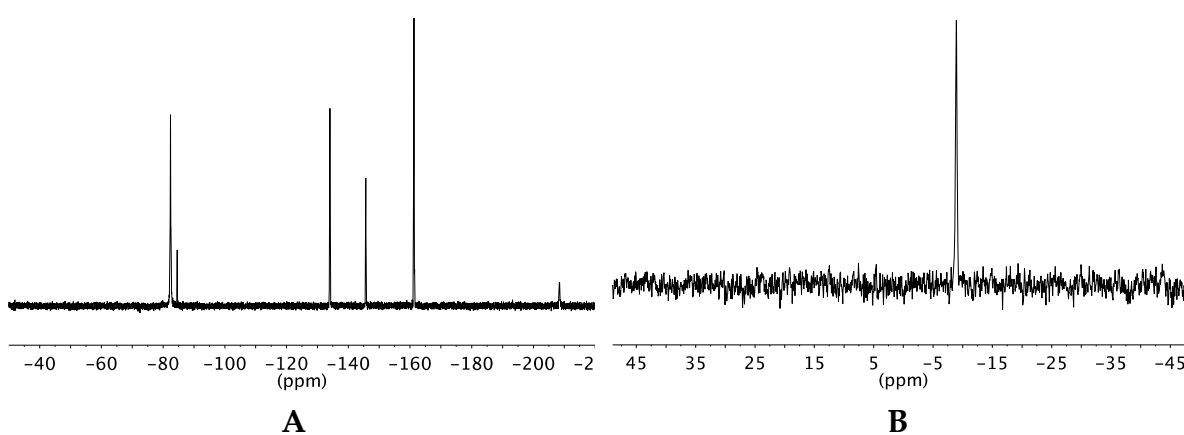

**Figure S7.**  $^{19}\text{F}$  (A) and  $^{31}\text{P}\{^1\text{H}\}$  (B) NMR spectra of  $[\text{Yb}(\text{F}_7\text{-acac})_3\{(\text{Ar}^{\text{F}})_3\text{PO}\}_2]$  (**10**) recorded in  $d_6$ -acetone on a Varian Mercury-200 spectrometer at 298 K.
